# Supplementary material
Source: PubMed Central journal article supplement (PMC3585109)
Supplement: supp_M112.437400_jbc.M112.437400-1.pdf [file supp_M112.437400_jbc.M112.437400-1.pdf]

**SUPPLEMENTARY TABLE I.** Primers used for gene expression analysis (RT-qPCR), ChIP, and q3C.

| <b>Primer Name or Location</b> | <b>Sequence</b>           |
|--------------------------------|---------------------------|
| <b>qRT-PCR</b>                 |                           |
| MUC6 F                         | GGCCACCGTCATCACCTATC      |
| MUC6 R                         | GACAGCTGATTAGTTGTGGAAACAG |
| MUC2 F                         | GCTGCAACATTACCGTCTGCAAGT  |
| MUC2 R                         | TGGTACTCAGCATTCCCGTGAACA  |
| MUC5AC F                       | GTGGTGTGACCCGCAAGCC       |
| MUC5AC R                       | GTCAGGGTATGCTCACGTTCCAGAG |
| MUC5B F                        | GGACCCTGGAGAACTGCACGGTGG  |
| MUC5B R                        | GTGGAATAGTGGGAGCCGCCCC    |
| 18s rRNA F                     | CGGCTACCACATCCAAGGAA      |
| 18s rRNA R                     | GCTGGAATTACCGCGGCT        |
| <b>ChIP-qPCR</b>               |                           |
| 944656.5 I F                   | GATTGGGTAAATGAGGGTATAG    |
| 944656.5 I R                   | CAACTGCTGCCTTAC           |
| 980804.5 II F                  | TCTCACTTCTGGGTTGTA        |
| 980804.5 II R                  | CTTGCTGCCTCTGGTT          |
| 1042164 III F                  | TCATCTGAGCACAGGGAGAGGCT   |
| 1042164 III R                  | TTTCACTCCGCATCCGCTGGTTAT  |
| 1051123 IV-1 F                 | TCTGTCCCAGAGCCTCCCATCAAT  |
| 1051123 IV-2 R                 | TGTGCCTGCATGTTGGCAAGT     |
| 1051359 IV-3 F                 | AACCTTCCATGGTGCCACAC      |
| 1051359 IV-3 R                 | AGCAAAGACTGTGGTCCCAGGTT   |
| 1060130 V F                    | GAAGATGGTACTGGAT          |
| 1060130 V R                    | GGTTCTCACGATATTG          |
| 1090328 VI F                   | GCGTTGTCAGTGGAGT          |
| 1090328 VI R                   | AGACGACTTGGGAGGA          |
| 1108936 VII F                  | CGTGTCTCAACTCGCTAT        |
| 1108936 VII R                  | TGGGCAGATGTTCCCTAAA       |
| 1160999 VIII F                 | TCTGAGTGCTGTCTTT          |
| 1160999 VIII R                 | ACACACAGAAATCTGC          |
| 1224307 IX F                   | TTTCCCAGCCCTCCTGGACTT     |
| 1224307 IX R                   | ACGCCTGAGAATGGAAGGTCGGTT  |
| 1248346 X F                    | GGACTACATCAAGGTCAGCAT     |
| 1248346 X R                    | TTCTCACCAGGGCACTG         |
| 1254625 XI F                   | AGGGTTCTGAGACATGAG        |
| 1254625 XI R                   | GCTGGGAATTTTCTCTTCA       |
| 1285844 XII F                  | AGAGAATGAGACCTAGCA        |
| 1285844 XII R                  | TCGTGATAGTGAGTGAATT       |
| 1315124 XIII F                 | GCTTACGGGAGTTCAC          |
| 1315124 XIII R                 | TCAGACCCTTGCTTGT          |
| <b>q3C</b>                     |                           |
| <i>For MUC2 promoter bait</i>  |                           |
| Forward primer                 | CTGCCTGTAACCTCAGAC        |

|                                                                                                                                                                    |                         |
|--------------------------------------------------------------------------------------------------------------------------------------------------------------------|-------------------------|
| Probe                                                                                                                                                              | CTCCTACCTGGGACCTTGCC    |
| Reverse primer_948899                                                                                                                                              | CAGAGCTTATTCTTGTGACA    |
| Reverse primer_955151                                                                                                                                              | GCTTCTCACAAAGGTGTA      |
| Reverse primer_963652                                                                                                                                              | GGTCAACAGAGCAAGATC      |
| Reverse primer_984664                                                                                                                                              | TCAGCAGTTTGACAGACA      |
| Reverse primer_1004725                                                                                                                                             | ATGAATGAATGAATGAACGACAG |
| Reverse primer_1025813                                                                                                                                             | CCTTCAAGATCCTGACAGA     |
| Reverse primer_1030994**                                                                                                                                           | AGGCAAGTTCCTGGAA        |
| Reverse primer_1038494                                                                                                                                             | GGTCAGACAAGCACAA        |
| Reverse primer_1062047                                                                                                                                             | CCTGAGAAGGTCTACCAA      |
| Reverse primer_1067225*                                                                                                                                            | ACTCGATTATGCACAGATG     |
| Reverse primer_1085840                                                                                                                                             | GCTTGTCTTCCA ACTTCA     |
| Reverse primer_1091421                                                                                                                                             | GTCACTTACTCGGAGTTG      |
| Reverse primer_1110726                                                                                                                                             | CTGTGTTGTCCGTGTTTC      |
| Reverse primer_1130235                                                                                                                                             | GTGGATCACTTGAGTTCAG     |
| Reverse primer_1138963                                                                                                                                             | CCTGCTCTGTGATGGTATA     |
| Reverse primer_1144403                                                                                                                                             | CCTCACATCTCCTGAACC      |
| Reverse primer_1151947                                                                                                                                             | GAGCAGCTGGAGATACTG      |
| Reverse primer_1218084                                                                                                                                             | CCTTCCACTCACCTTAC       |
| Reverse primer_1220196                                                                                                                                             | CAGTGTGTGTTGCAGATC      |
| Reverse primer_1233467                                                                                                                                             | TCTCCCTTTGTTCTTTGTG     |
| Reverse primer_1242231                                                                                                                                             | TCTCCCTTTGTTCTTTGTG     |
| Reverse primer_1247570                                                                                                                                             | CGTCTGTTTTGCTCCAAG      |
| Reverse primer_1252603                                                                                                                                             | CACGATGAAGAAGCTCGA      |
| <i>For MUC6 promoter bait</i>                                                                                                                                      |                         |
| Forward primer                                                                                                                                                     | TGCTGAGAGGTTGGATG       |
| Probe                                                                                                                                                              | CCCCTCATCGTCCCCACCTC    |
| Reverse primer_1073247                                                                                                                                             | GACAGAGATTTTCCAGGC      |
| Additional reverse primers used with the <i>MUC6</i> promoter bait were the same as those used for the <i>MUC2</i> promoter bait (in the range of 948899~1144403). |                         |

Note: Normalizing fragment for the *MUC2* (\*) and for the *MUC6* (\*\*) promoter baits.
